# Supplementary material for: DNA methylation profiles in the blood of newborn term infants born to mothers with obesity
Source: PubMed Central journal article supplement (PMC9060365; doi:10.1371/journal.pone.0267946), 2022-05-02

**S1 Fig. Histograms of the percent methylation distribution for males (A) and females (B) in the OBS cohort. X axis shows percent methylation per CpG site and y axis shows the frequency. C: Neonates from non-obese control mothers (n=10/sex), O: Neonates from mothers with obesity (n=10/sex).**

**A (Males)**

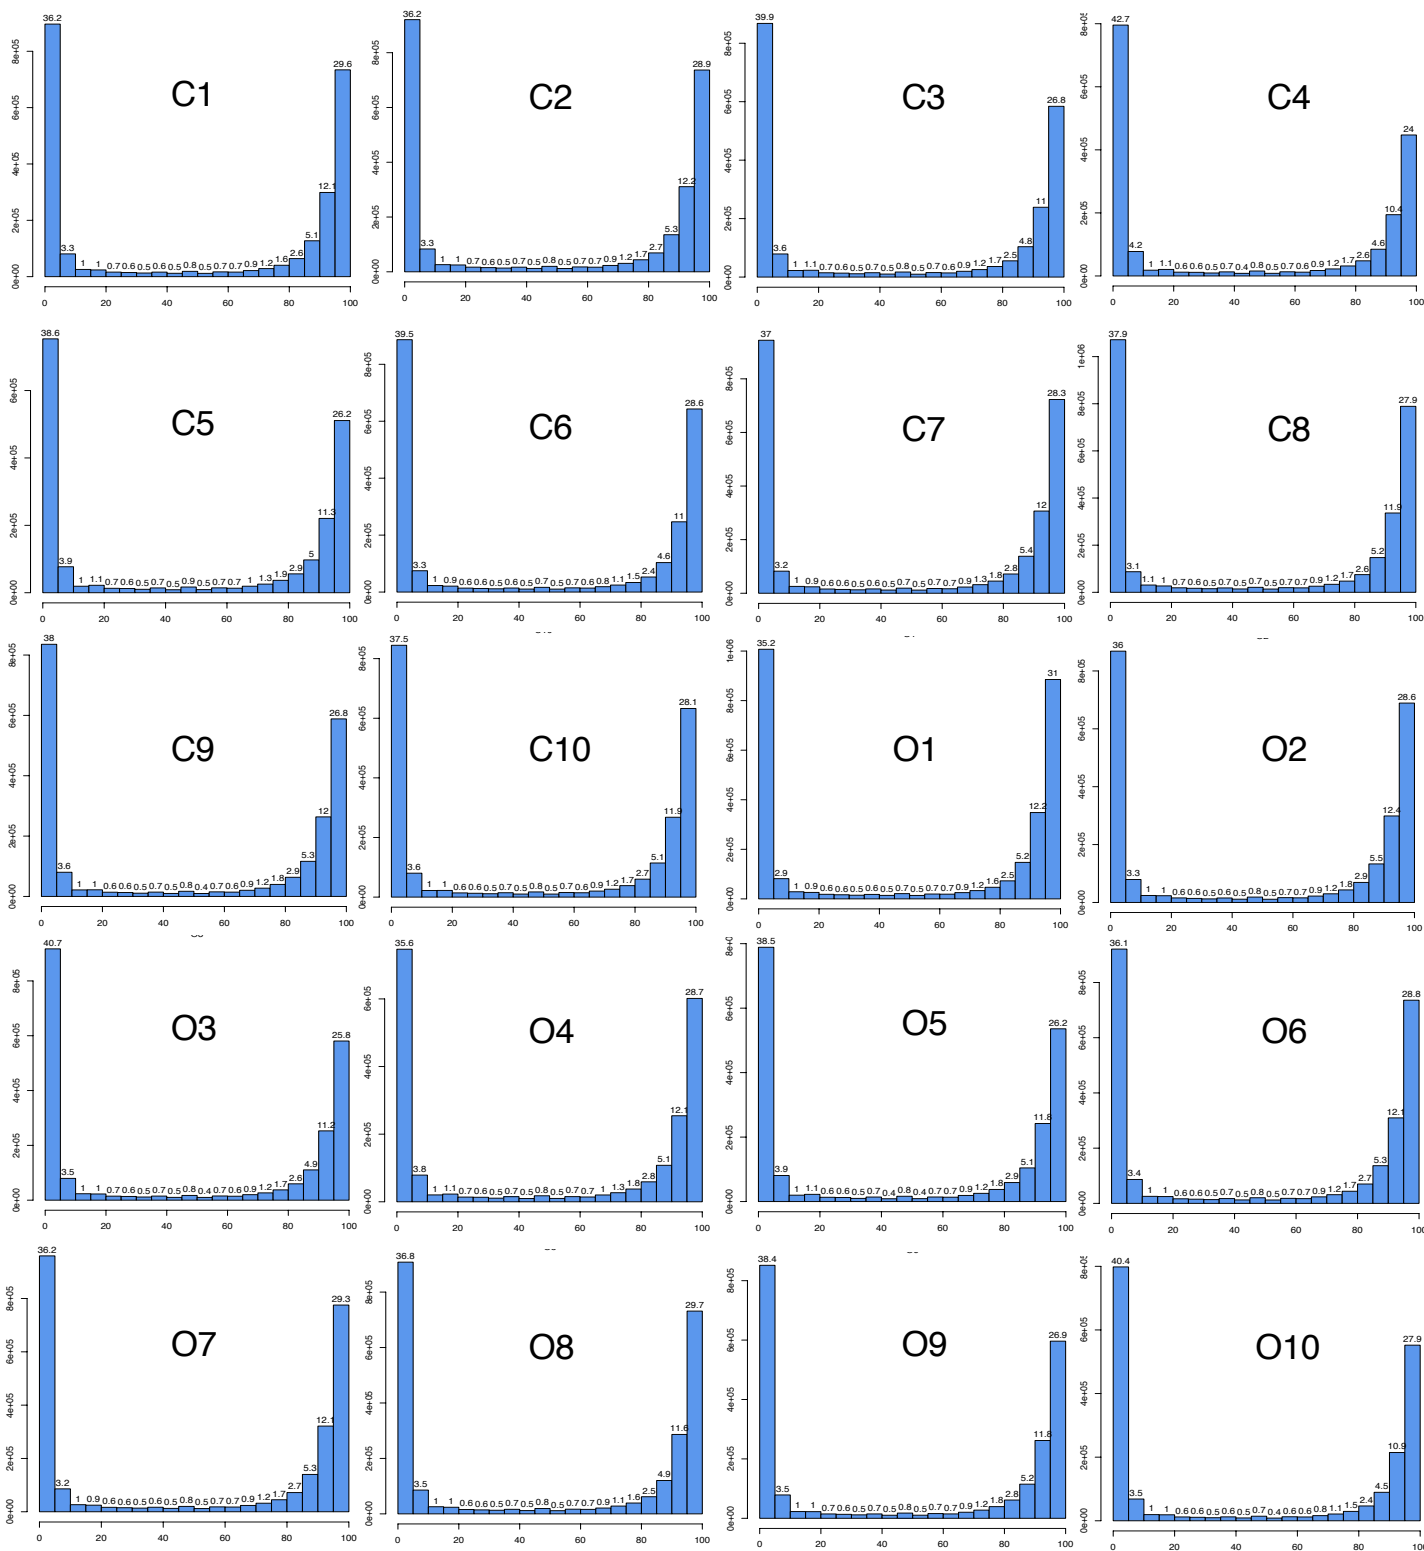

# B (Females)

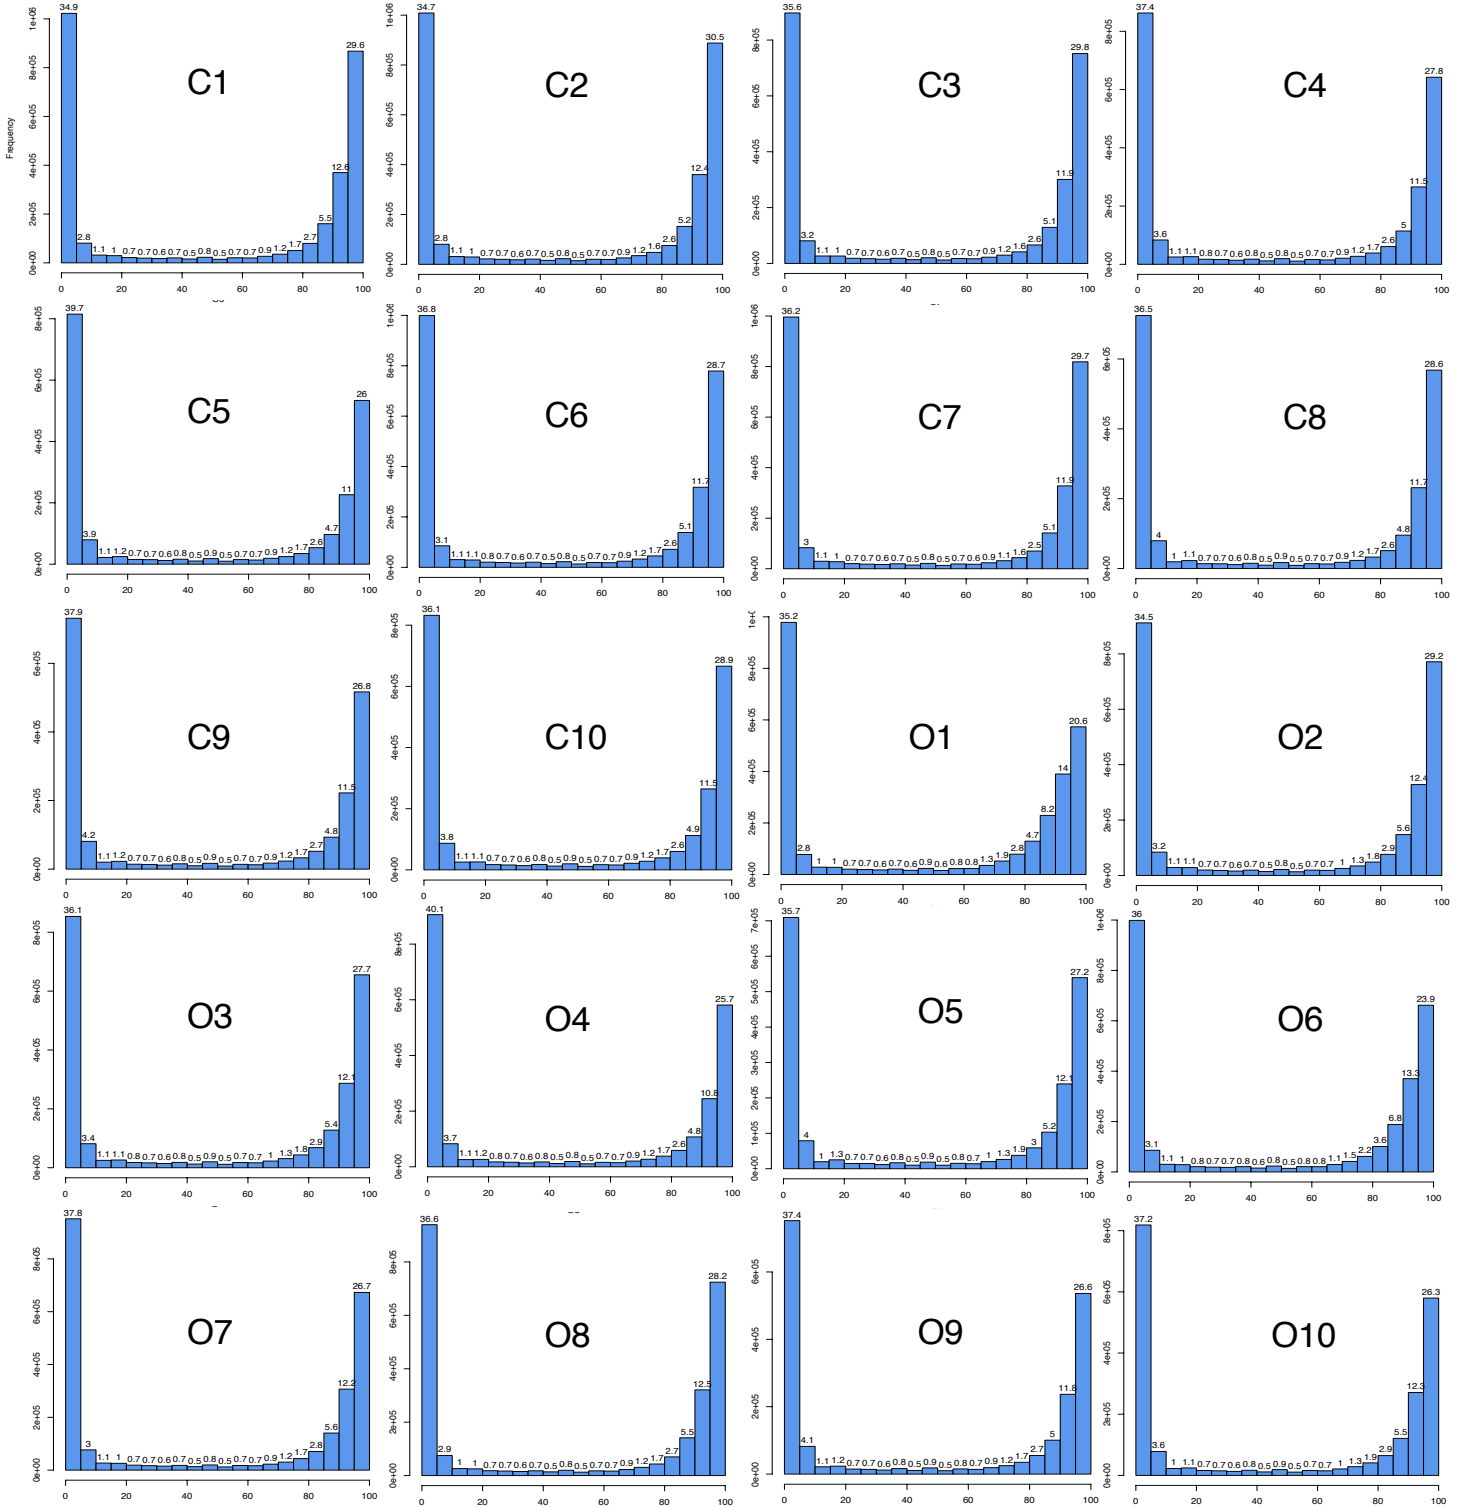

Supplement: pone.0267946.s001.pdf [file pone.0267946.s001.pdf]
